# Supplementary material for: Involvement of Polycomb Repressive Complex 2 in Maturation of Induced Pluripotent Stem Cells during Reprogramming of Mouse and Human Fibroblasts
Source: PLoS One. 2016 Mar 3;11(3):e0150518. doi: 10.1371/journal.pone.0150518 (PMC4777544; doi:10.1371/journal.pone.0150518)
Supplement: S4 Table — (XLSX) [file pone.0150518.s006.xlsx]

## Sheet: Sheet1
G.symbol	Samavarchi-Tehrani et al.,	Polo et al.,	Pattern
Acp6	2.55007	3.31625	Up-regulated
Aldh3a1	5.74445	3.58587	Up-regulated
Apoc1	1.62268	3.04953	Up-regulated
Apoe	2.79321	2.51814	Up-regulated
Cdh1	5.31517	7.43606	Up-regulated
Dab1	1.65339	2.27489	Up-regulated
Dnmt3b	1.73071	4.10825	Up-regulated
Dnmt3l	3.63841	5.6683	Up-regulated
Dppa4	3.9478	5.74659	Up-regulated
Dyrk3	2.26516	2.74496	Up-regulated
Fabp3	3.16852	6.20618	Up-regulated
Fgfbp1	5.71356	4.59921	Up-regulated
Gdf3	2.4581	4.46209	Up-regulated
Igfbp2	2.28659	3.97188	Up-regulated
Jarid2	2.89108	2.85687	Up-regulated
Kcnk1	3.48264	2.72437	Up-regulated
Kif18a	2.31632	2.84504	Up-regulated
Lef1	3.69163	3.39702	Up-regulated
Lefty1	1.93295	4.32395	Up-regulated
Mkrn1	2.56867	3.09726	Up-regulated
Morc1	1.71032	5.35104	Up-regulated
Mybl2	1.87849	2.05352	Up-regulated
Nanog	4.66299	5.24275	Up-regulated
Nefl	3.45795	4.57652	Up-regulated
Nr0b1	1.80858	3.94232	Up-regulated
Nr5a2	3.63445	2.86195	Up-regulated
Otx2	3.67121	7.3129	Up-regulated
Parp1	2.60265	2.49685	Up-regulated
Phc1	2.57828	2.85553	Up-regulated
Pipox	5.66733	4.59985	Up-regulated
Pla2g1b	4.11273	2.43087	Up-regulated
Plekha7	2.26455	3.56535	Up-regulated
Podxl	6.42545	3.56481	Up-regulated
Pou5f1	8.68182	5.67435	Up-regulated
Ralgps2	3.82477	2.51578	Up-regulated
Rhpn2	2.33924	4.34197	Up-regulated
Rif1	2.84877	3.17037	Up-regulated
Rpp25	3.64536	2.97275	Up-regulated
Sall4	2.36635	2.97613	Up-regulated
Serpinb6c	2.53635	2.62036	Up-regulated
Slc2a3	5.78546	2.87754	Up-regulated
Slc6a15	3.16674	3.01028	Up-regulated
Slc7a3	3.56715	3.85084	Up-regulated
Sox2	3.09338	7.62485	Up-regulated
Spint1	4.51136	3.98842	Up-regulated
Stat4	2.52935	2.8967	Up-regulated
Stmn2	4.33341	4.8839	Up-regulated
Tcl1	3.44561	4.33105	Up-regulated
Tdgf1	5.03043	4.54898	Up-regulated
Tdh	3.32226	5.21234	Up-regulated
Tjp2	2.40124	3.16255	Up-regulated
Tpd52	1.88962	2.13365	Up-regulated
Trh	5.84256	6.22672	Up-regulated
Upp1	3.63997	6.92386	Up-regulated
Utf1	4.30396	3.87401	Up-regulated
Zfp42	1.88408	6.62743	Up-regulated
Aox1	-1.90116	-3.32015	Down-regulated
Cdc42ep3	-2.92731	-3.50199	Down-regulated
Ebf1	-3.61373	-1.66697	Down-regulated
Epb4.1l3	-1.86363	-2.32185	Down-regulated
Epha3	-3.95108	-3.65483	Down-regulated
Gpr124	-2.55935	-2.92782	Down-regulated
Gsn	-2.13329	-1.86777	Down-regulated
Hs6st2	-3.20336	-1.73194	Down-regulated
Leprel2	-2.52863	-1.8298	Down-regulated
Nov	-2.2394	-4.17191	Down-regulated
Pdgfc	-2.46623	-5.1827	Down-regulated
Slc41a2	-2.47119	-5.26753	Down-regulated
Slit2	-2.68862	-3.02158	Down-regulated
Thbs2	-3.36443	-2.63527	Down-regulated
Wnt5a	-2.06574	-1.88552	Down-regulated
